# Supplementary material for: Ion diffusion coefficients in poly(3-alkylthiophenes) for energy conversion and biosensing: role of side-chain length and microstructure
Source: Royal Society of Chemistry journal article supplement (doi:10.1039/d0tc03690k), 2020-01-01
Supplement: d0tc03690k2.xlsx [file d0tc03690k2.xlsx]

## Sheet: Sheet1
Film	Voltage [V]	Chi-Sq	Rs [Ω]	R1 [Ω]	QCPE1	PCPE1	Rw	ωd	γ	Rct [Ω]	QCPE2	PCPE2
P3BT1	0	0.0009847	4.3105e-06	373.2	2.5896e-08	0.92501	54713	0.52645	0.53636	532.5	1.9868e-07	1.022
	0.1	0.0010975	2.986	298	1.886e-08	0.9506	24466	0.43264	0.57243	296.3	2.1554e-07	1.062
	0.2	0.00069998	1.455e-06	14652	0.00020232	0.40102	798	0.53977	0.9405	235.6	1.4566e-08	0.98668
	0.3	0.00026211	1.9778e-05	259.1	9.654e-05	0.5999	6568	0.86445	0.90908	280.8	2.6056e-08	0.92963
	0.4	0.00014591	5.7536e-07	58.54	1.913e-05	0.83088	3439	0.68387	0.84375	276.5	1.7848e-08	0.96006
	0.5	0.00041194	1.9076e-06	268.6	1.8454e-08	0.95873	1694	0.43933	0.75004	66.69	3.9263e-06	0.91628
	0.6	0.0010707	3.505	268.2	2.6942e-08	0.93188	1810	0.43119	0.65656	84.07	5.9238e-07	1.023
	0.7	0.0011711	4.171	268.1	2.9695e-08	0.9263	1817	0.48552	0.62653	96.6	2.8235e-07	1.065
	0.8	0.00048908	5.97	252	2.5952e-08	0.94015	1783	0.4418	0.70143	145.9	7.0693e-07	0.94547
	0.9	0.00064888	7.851	242.7	2.4117e-08	0.94903	1957	0.395	0.73788	298.3	4.2408e-06	0.79414
	1	0.00062535	0.3626	264.1	3.6099e-08	0.91078	5242	1.001	0.48727	914.4	2.6746e-06	0.89604
P3BT2	0	0.0041013	5	18742	5.3428e-06	0.85873	2462	0.017441	0.41186	304.5	9.6555e-09	1
	0.1	0.0013274	5	5193	2.3758e-05	0.83165	913.7	0.010023	0.36847	247.9	9.8444e-09	1
	0.2	0.00027033	3.289e-06	240.5	0.0001528	0.92396	3741	0.86969	0.557	311.9	2.6003e-08	0.93111
	0.3	0.00042728	16.76	60.7	8.8104e-05	0.82105	3569	0.64569	0.85806	279.2	1.233e-08	1
	0.4	0.00038408	4.308	9.323	1.0794e-07	1	2485	0.65014	0.84981	275.8	1.2185e-08	1
	0.5	0.00053941	5	0.028517	0.00014017	0.87814	1708	0.62642	0.85452	277.4	1.1573e-08	1
	0.6	0.0010582	12.49	222.4	1.4535e-08	1	1451	0.59404	0.87017	43.83	7.3033e-08	1
	0.7	0.0011438	12.37	115.6	2.7885e-08	1	1658	0.5953	0.86977	148.1	2.1699e-08	1
	0.8	0.001265	12.03	114.7	2.8002e-08	1	1956	0.60057	0.8687	146.9	2.1776e-08	1
	0.9	0.001331	11.88	136	2.3592e-08	1	2251	0.60584	0.86776	124	2.5727e-08	1
	1	0.0011037	17.3	36.27	2.0003e-07	1.008	2618	0.61654	0.86236	226.4	9.9522e-09	1.024
P3BT3	0	0.00019283	3	311.3	2.5729e-08	0.93671	59773	2.181	0.43491	1195	1.2993e-06	0.86145
	0.1	0.001249	2.533	2587	1.0549e-05	0.69987	9412	0.35754	0.64113	251.9	1.1423e-08	1
	0.2	0.00090255	3.832	275.5	5.8311e-06	0.87976	2445	0.31733	0.42018	238.4	1.1059e-08	1
	0.3	0.00031048	1.108	181.8	6.4748e-09	1.075	7163	0.6665	0.85106	455.4	0.00013696	0.38882
	0.4	9.4262e-05	0.59539	255.2	1.7106e-08	0.97367	3242	0.65722	0.83292	83.13	1.9987e-05	0.69601
	0.5	0.00012184	0.52723	259.4	1.8346e-08	0.96752	2308	0.67514	0.82828	38	5.7604e-06	0.85914
	0.6	0.00075868	10.72	128	2.7817e-06	0.8625	3042	0.6214	0.84128	234.4	1.7358e-08	0.97976
	0.7	0.00067913	10.84	114.3	2.3807e-06	0.8868	2689	0.61305	0.85038	236.2	1.865e-08	0.97337
	0.8	0.00095412	5.528	156.7	1.9449e-06	0.91193	2975	0.81358	0.74997	245.7	2.3335e-08	0.95492
	0.9	0.00041905	0.00010348	320.5	3.9871e-06	0.87212	2034	0.63552	0.59213	252.7	2.5008e-08	0.94567
	1	0.00087235	20.19	796.5	3.7547e-06	0.93951	2826	0.53205	0.52055	217.8	8.9638e-09	1.037
RR-P3HT1	0	0.00010503	0.062284	319.4	1.214e-08	1	213900	0.84213	0.78609	431.2	8.1801e-06	0.66197
	0.1	0.00045967	12	295.8	2.4971e-08	0.94874	12771	0.57751	0.54072	49.75	5.6078e-06	0.81445
	0.2	0.00010873	12	280.6	1.802e-08	0.97465	4266	0.44388	0.88393	336.7	0.00020846	0.59542
	0.3	0.00023302	12	272.5	1.5165e-08	0.98761	3379	0.45101	0.87255	21.84	0.00015335	0.74139
	0.4	0.00021539	12	266.5	1.3347e-08	0.99922	11660	0.33781	0.96242	20.7	0.00026304	0.84277
	0.5	0.00023656	12	260.2	1.071e-08	1.016	7888	0.37438	0.91291	2.299	0.00030353	0.81966
	0.6	0.00029913	12	257.5	1.2826e-08	1.001	4231	0.38403	0.91235	0.70477	0.00031363	0.80092
	0.7	0.00091889	12	255.5	1.2585e-08	1.003	6861	0.26118	0.89705	2.205	0.00032387	0.81373
	0.8	0.00090424	12	254.6	1.2503e-08	1.004	9114	0.2589	0.91014	2.716	0.00028396	0.82289
	0.9	0.00088273	12	254.6	1.2506e-08	1.004	11061	0.25732	0.92277	3.333	0.00026032	0.82693
	1	0.0011355	12	269.3	2.1682e-08	0.96191	9522	0.26488	0.90291	29.28	0.00023793	0.82389
RR-P3HT2	0	0.00016428	3.1	370.3	1.4265e-08	0.977	22100	0.26924	0.64302	2590	8.0732e-06	0.77295
	0.1	6.9563e-05	3.1	304.7	2.1748e-08	0.94957	6312	0.3443	0.55654	1239	2.0824e-05	0.74915
	0.2	0.00013152	3.1	287.9	1.7131e-08	0.96902	2431	0.4339	0.86265	303.1	0.00014969	0.6457
	0.3	0.00035412	3.1	283.9	1.655e-08	0.97126	4258	0.41514	0.89923	38.26	0.0002478	0.70024
	0.4	0.00026107	3.1	279.5	1.3256e-08	0.99037	7093	0.37082	0.91939	8.291	0.00026975	0.78862
	0.5	0.00027803	3.1	275.5	1.2634e-08	0.99444	6668	0.36916	0.91598	1.026	0.00029598	0.79127
	0.6	0.00047878	3.1	273.1	1.4751e-08	0.98115	4642	0.37413	0.92178	0.82848	0.00031011	0.77763
	0.7	0.00062285	3.1	270.7	1.4502e-08	0.98275	5450	0.36822	0.92666	0.95163	0.00028106	0.78742
	0.8	0.00074863	3.1	268.6	1.4172e-08	0.98487	6863	0.36574	0.92855	1.3	0.00024783	0.78772
	0.9	0.00086864	3.1	267.1	1.3991e-08	0.98611	8158	0.36448	0.92862	1.687	0.00022727	0.78101
	1	0.00090344	3.1	271.4	1.6149e-08	0.97561	8973	0.36663	0.92697	2.806	0.00021125	0.76343
RR-P3HT3	0	0.0004545	0.6613	224.1	1.5415e-08	1	210180	0.52688	0.87861	227.7	5.226e-06	0.66791
	0.1	0.0006508	12	286.6	3.6135e-08	0.93009	14441	0.39621	0.91516	6391	3.7211e-05	0.69602
	0.2	0.00047648	12	270	2.4567e-08	0.95977	4335	0.46475	0.87845	111.4	0.00015954	0.63767
	0.3	0.000414	12	262.7	2.1931e-08	0.96875	8504	0.40256	0.91179	24.26	0.00016333	0.83636
	0.4	0.00060924	12	254.7	1.5108e-08	0.99921	19620	0.25969	0.91122	47.4	0.00020756	0.85211
	0.5	0.00054311	12	250.6	1.3684e-08	1.007	18831	0.25836	0.89766	27.34	0.00023271	0.84762
	0.6	0.00085363	12	248.8	1.6054e-08	0.99243	10208	0.26262	0.90155	9.517	0.00023761	0.84037
	0.7	0.00025557	12	249.6	1.6966e-08	0.98803	14176	0.33852	0.96342	8.367	0.00020456	0.85164
	0.8	0.00027238	12	252.3	1.7365e-08	0.98614	17362	0.33849	0.96344	10.51	0.00018126	0.84906
	0.9	0.00055078	12	265.3	2.4935e-08	0.95805	16123	0.35661	0.95651	36.36	0.00017432	0.82376
	1	0.00039472	12	245.3	1.8163e-08	0.98359	2696	0.52659	0.79478	375.5	2.5441e-06	0.90766
P3OT1	0
	0.1	0.00017896	13	294.1	1.05e-08	1.008	8459	0.52608	0.026365	0.0038259	5.169e-06	0.91545
	0.2	0.00016347	3.402	243.8	3.0424e-08	0.9444	6245700	0.27622	0.99993	2457900	0.00029746	0.40243
	0.3	0.00026216	13	300.6	1.3372e-08	0.98953	2884	0.33647	0.72484	3500	3.4518e-06	0.9186
	0.4	0.00076297	13	318.2	1.8983e-08	0.96513	3131	0.38482	0.75441	3286	3.8208e-06	0.85162
	0.5	0.00099499	13	296.7	1.8257e-08	0.9722	2524	0.30965	0.75542	2974	3.0669e-06	0.78302
	0.6	0.0010946	13	297.8	2.0583e-08	0.9597	2077	0.2839	0.77502	2744	1.2219e-06	0.85836
	0.7	0.0009021	13	299.5	1.9709e-08	0.96239	1956	0.28231	0.77655	2699	9.5441e-07	0.87678
	0.8	0.00072882	13	301.7	1.8761e-08	0.96549	2196	0.28501	0.77454	2776	8.3071e-07	0.88655
	0.9	0.00076007	13	304.2	1.8217e-08	0.96707	2634	0.28844	0.77317	3023	8.0134e-07	0.88746
	1	0.00090488	13	302.7	1.6643e-08	0.97372	4189	0.40713	0.79003	3514	9.1182e-07	0.87052
P3OT2	0	0.00056834	2.977	25340	6.9964e-06	0.59053	330.3	0.0075364	0.49747	213.9	1.5876e-08	1
	0.1	0.00087357	3	9616	1.3533e-05	0.59677	190.2	0.0065767	0.49716	235.4	1.2024e-08	1
	0.2	0.00043945	10.82	244.1	1.3098e-08	0.99214	2380	0.22298	0.33294	236.9	2.2223e-06	0.82283
	0.3	0.00035612	5.029	357.9	5.3846e-05	0.50786	4155	0.6348	0.83979	212.2	1.2077e-08	1.008
	0.4	0.00014094	0.0002963	99.2	1.9856e-05	0.70003	3600	0.67971	0.83648	251.6	1.7656e-08	0.96785
	0.5	8.3584e-05	2.5809e-06	47.5	7.6867e-06	0.85399	3005	0.70461	0.82937	255.5	1.8793e-08	0.96264
	0.6	0.0005242	13.65	67.14	7.9307e-06	0.77255	2793	0.67107	0.83155	224.3	1.3354e-08	1
	0.7	0.00068487	8.307	78.62	4.4972e-06	0.81919	3152	0.69559	0.81634	236.3	2.0664e-08	0.96372
	0.8	0.00093838	7.975	118.2	8.7161e-07	0.92366	3813	0.84848	0.75695	236.6	2.3841e-08	0.95455
	0.9	0.00090816	2.678	239.5	2.2533e-06	0.83702	3898	0.94356	0.73183	243.4	3.4822e-08	0.92433
	1	0.00047271	1.3025e-06	263	5.1519e-08	0.89255	2961	0.94418	0.52914	801.6	6.3183e-06	0.80778
P3OT3	0
	0.1	0.00041608	15.96	247.6	6.8909e-09	1.051	12349	0.95062	0.27064	3344	8.1565e-06	0.64483
	0.2	0.00058377	17.17	197.1	4.4332e-09	1.097	3180	0.35076	0.75335	1613	4.5193e-05	0.49735
	0.3	0.00068529	8.133	229.2	1.1287e-08	1.012	2540	0.36726	0.75471	366.1	3.2702e-05	0.54842
	0.4	0.00028384	1	259.2	1.5377e-08	0.98112	4117	0.61786	0.83129	169.5	3.0308e-05	0.58156
	0.5	0.00033682	1.8809e-05	282.7	2.0842e-08	0.95212	3336	0.69298	0.79082	92.47	8.9053e-06	0.75104
	0.6	0.00087699	2.762	290.1	2.9284e-08	0.92618	1769	0.39913	0.70823	88.24	1.7074e-06	0.91776
	0.7	0.00082831	6.677	274.4	2.5223e-08	0.94162	1901	0.41853	0.68729	124.4	1.1563e-06	0.89939
	0.8	0.00061067	5.523	271.9	2.591e-08	0.93984	2267	0.51068	0.64717	184.8	5.4617e-07	0.94781
	0.9	0.0004477	1.6033e-06	253	2.5426e-08	0.94406	2372	0.55299	0.61443	473.2	9.0724e-06	0.67224
	1	0.00042658	6.2222e-07	272.3	3.4722e-08	0.91765	3874	1.392	0.44565	1247	1.7477e-05	0.65018
P3DT1	0	0.0016662	1	459.7	6.0793e-08	0.87692	1565	0.0087916	0.39037	28494	3.1891e-06	0.80722
	0.1	0.00034401	1.1051e-06	187.6	5.38e-09	0.98	1075	0.0013003	0.43685	2.233e-05	3.6891e-05	0.3801
	0.2	0.00093243	1.4778e-06	269.1	4.9207e-08	0.89929	1.151	0.00014233	0.68165	3421	0.00018135	0.48172
	0.3	0.00050067	2.6585e-06	260.3	3.2403e-08	0.92949	7132	0.86157	0.92467	146.5	0.000132	0.55104
	0.4	0.00022043	2.65e-06	265.4	2.3395e-08	0.95442	6747	0.88902	0.90559	61.55	7.3946e-05	0.70467
	0.5	0.0003296	5.0284e-06	2.1944	3.5793	3.2755e-10	5436	0.92994	0.90133	57.18	0.00013244	0.47417
	0.6	0.00027514	2.2685e-06	223.8	1.5731e-08	0.99738	4862	0.88696	0.91679	52.42	0.00023695	0.38377
	0.7	0.00031827	2.2685e-06	228	1.8492e-08	0.98373	5509	0.88489	0.91368	47.7	0.00015737	0.42568
	0.8	0.00044506	2.2685e-06	237.8	2.5834e-08	0.95376	7095	0.87828	0.90981	54.49	9.2812e-05	0.51097
	0.9	0.001279	4.274	253.6	2.7345e-08	0.94529	7003	1.066	0.83439	59.32	1.5564e-06	1
	1	0.00068754	14.41	233.1	1.497e-08	1	12635	4.2	0.65752	391.5	5.5665e-06	0.86738
P3DT2	0
	0.1
	0.2	0.0010889
	0.3	0.00033225	14.73	211.8	7.6185e-06	0.75785	2628	0.60914	0.86677	264.2	1.1421e-08	1.007
	0.4	0.00028469	4.085	101.7	6.8338e-06	0.78243	2958	0.62878	0.85961	280.4	1.4189e-08	0.98565
	0.5	0.0002733	1.907	59.81	9.8055e-06	0.74984	2601	0.64325	0.8537	284.2	1.6518e-08	0.97349
	0.6	0.00066508	10.92	65.49	9.1955e-06	0.70255	2287	0.6213	0.85659	260.9	1.4825e-08	0.98938
	0.7	0.00078736	9.901	61.96	5.5635e-06	0.79961	2784	0.62208	0.8523	279.2	1.8162e-08	0.97047
	0.8	0.0015514	4.86	93.04	1.5553e-06	0.95448	2154	0.37612	0.75552	299.4	2.5653e-08	0.93999
	0.9	0.00073748	4.852	298.5	6.6142e-06	0.78866	3034	0.40916	0.67716	293.5	2.5478e-08	0.94232
	1	0.00046271	3.402	311.7	3.045e-08	0.92697	9917	10.95	0.27833	0.085441	1.9369e-06	0.92595
P3DT3	0
	0.1
	0.2	0.0010909
	0.3	0.00025769	11.48	250.7	1.431e-08	0.99059	2517	0.60905	0.86598	233.2	5.5551e-06	0.80508
	0.4	0.00027603	2.16	257.1	1.5548e-08	0.98115	2881	0.6309	0.86076	110.6	6.586e-06	0.78666
	0.5	0.00031275	1.028	257.9	1.7507e-08	0.97219	2515	0.63988	0.85763	67.04	6.1821e-06	0.79998
	0.6	0.0004701	9.461	238.7	1.6438e-08	0.98363	2167	0.62212	0.86158	62.75	7.8231e-06	0.75056
	0.7	0.00057582	8.276	248.9	1.9422e-08	0.96884	2523	0.6238	0.86046	50.14	3.725e-06	0.87162
	0.8	0.0007568	7.713	249.5	2.1356e-08	0.96238	3567	0.63476	0.8365	98.63	3.0259e-06	0.8835
	0.9	0.0011119	2.985	261.1	3.0268e-08	0.93353	5706	1.19	0.67473	243.8	3.5824e-06	0.8704
	1	0.00045153	0.00016896	274.1	3.7497e-08	0.91559	7541	3.397	0.36739	90.85	1.1567e-06	0.98237
P3DDT1	0
	0.1
	0.2	0.0012061	6.822	232.6	1.9737e-08	0.98077	0.0853	0.46425	1	20982	8.8058e-06	0.64681
	0.3	0.00049869	6.822	230.9	2.245e-08	0.96962	722	0.030494	0.39031	1895	4.8613e-06	0.73125
	0.4	0.00043132	13	225	1.5898e-08	1.003	2933	0.47369	0.7193	1040	1.6944e-06	0.83879
	0.5	0.00065851	13	200.5	1.3298e-08	1.024	4957	0.85589	0.75191	1370	1.0828e-06	0.83709
	0.6	0.00028481	13	184.8	2.1151e-08	0.99536	4480	0.76981	0.76684	1950	8.658e-07	0.83471
	0.7	0.00022076	13	164.4	1.8976e-08	1.011	4427	0.82255	0.75079	1819	8.0039e-07	0.83037
	0.8	0.00039578	13	155.1	1.7078e-08	1.024	4537	0.83952	0.55021	1743	1.2341e-06	0.79696
	0.9	0.0003564	13	160.8	2.1162e-08	1.009	5483	0.82592	0.53948	1497	1.1848e-06	0.80029
	1	0.00033892	13	237.1	2.1991e-08	0.97863	5109	0.58573	0.58353	1452	8.6867e-07	0.82416
P3DDT2	0	0.0008437	8.298	317.9	2.7684e-08	0.95963	65916	2.713	0.28137	7.3707e-05	4.5181e-07	0.80219
	0.1	0.00026633	0.00034516	321.3	2.2096e-08	0.95818	48645	14.46	0.31998	5716	2.5743e-06	0.7064
	0.2	0.00060189	17.87	221.9	6.0442e-09	1.063	25387	1.729	0.63293	2441	7.6851e-06	0.65742
	0.3	0.00025973	12.87	227	1.0929e-08	1.012	5065	0.63129	0.8486	505.4	1.1603e-05	0.66597
	0.4	0.00013843	9.3755e-05	247.7	1.4551e-08	0.98201	3888	0.63844	0.85155	181	1.4589e-05	0.66736
	0.5	0.00030191	1.511e-05	263.4	1.7208e-08	0.96651	3807	0.6563	0.85774	79.12	2.2013e-05	0.70107
	0.6	0.0006013	4.126	267.5	2.1048e-08	0.95003	3255	0.62875	0.86284	31.15	1.9009e-05	0.8554
	0.7	0.00075107	4.722	264.9	1.9966e-08	0.95443	3314	0.62438	0.86046	11.62	1.4243e-05	1
	0.8	0.00079952	1.7062e-05	269	2.7811e-08	0.92827	4543	0.62061	0.85549	10.52	2.2535e-05	1
	0.9	0.00071786	2.5021e-05	268.4	2.6655e-08	0.9312	5602	0.62011	0.85175	9.691	3.0007e-05	1
	1	0.00077389	7.466	252.8	1.8909e-08	0.96295	4607	0.63938	0.85929	39.14	2.1337e-06	1.001
P3DDT3	0
	0.1
	0.2	0.0001058	1.1777e-06	257.4	2.3175e-08	0.96339	6130	0.075704	0.25122	7193	3.2171e-06	0.70414
	0.3	0.00025207	5.224	232.2	1.879e-08	0.97367	1423	0.080009	0.38678	1542	3.7574e-06	0.75696
	0.4	0.00017733	1.116	209	1.2293e-08	1.011	8230	0.84766	0.89722	559.6	1.3168e-05	0.63602
	0.5	0.00014506	2.7567e-06	193.6	1.1094e-08	1.026	7628	0.97283	0.87306	272.5	3.5096e-05	0.52701
	0.6	0.00028164	3.5208e-06	205.9	1.9376e-08	0.97809	6632	0.9092	0.89513	163.4	5.692e-05	0.50325
	0.7	0.00036165	1.014	205.6	1.8033e-08	0.98181	6034	0.90534	0.89266	123	3.0383e-05	0.55967
	0.8	0.0004265	6.859	212.7	1.629e-08	0.98676	6970	0.92093	0.88429	106.9	1.1135e-05	0.69189
	0.9	0.00048199	6.248	225.2	1.8876e-08	0.97202	7719	0.94784	0.87331	103.8	7.0392e-06	0.78144
	1	0.00027066	1.488	236.9	2.324e-08	0.9506	3169	0.41932	0.72505	443.2	2.9938e-06	0.92827
RRa-P3HT1	0	9.3011e-05	7	267.7	2.0886e-08	0.97413	2397200	0.47132	0.87942	9978	1.8573e-06	0.75466
	0.1	0.00077724	5	242.7	1.7949e-08	0.99058	4301300	0.2388	0.96919	13359	2.5058e-06	0.7154
	0.2	0.0021703	5	208.6	1.1238e-08	1.036	5504600	0.2215	0.99033	10430	3.5976e-06	0.66962
	0.3	0.00016781	2.4745e-06	211.6	1.529e-08	1.013	135930	0.26628	0.63445	8526	6.1864e-06	0.62078
	0.4	0.00051038	2.4745e-06	286.4	2.3094e-08	0.95285	17453	0.69043	0.83909	965.7	3.2129e-05	0.69684
	0.5	0.00049913	2.1	277.7	1.7203e-08	0.97486	68835	0.74943	0.95317	184.3	0.00019929	0.69683
	0.6	0.00020025	14.19	258	1.3087e-08	1.002	15128	0.6825	0.95204	16.8	0.00022191	0.71885
	0.7	0.00021979	14.11	258.1	1.32e-08	1.001	15903	0.66838	0.95114	18.98	0.00019104	0.78281
	0.8	0.00021265	13.97	259.3	1.3371e-08	0.99922	25416	0.66458	0.95197	26.71	0.00014524	0.81861
	0.9	0.000218	13.54	262.3	1.3928e-08	0.99555	34262	0.66708	0.95208	34.52	0.00012272	0.81889
	1	0.00052905	2.258	227.8	1.267e-08	1.013	18348	0.72778	0.94485	172.8	0.00020327	0.39076
RRa-P3HT2	0	0.0016224	10	478.9	1.1455e-07	0.90934	83086	0.26599	0.64027	11113	2.527e-07	0.80015
	0.1	0.0016085	10	485.7	8.2939e-08	0.92907	86058	0.26533	0.63452	11948	2.5574e-07	0.80175
	0.2	0.0015612	10	496	7.392e-08	0.93784	129540	0.50116	0.66102	12484	2.9998e-07	0.78915
	0.3	0.00042979	10	244.4	2.7922e-08	1.016	8544	0.081297	0.31234	1776	8.868e-08	0.8793
	0.4	0.00017985	5	297.6	1.7753e-08	0.96942	4677	0.57953	0.82046	538.9	2.5756e-05	0.72845
	0.5	0.00020449	0.26491	293.7	1.5581e-08	0.97524	4525	0.5553	0.84169	39.86	0.000178	0.6694
	0.6	0.00021266	0.26491	273.9	1.2516e-08	0.99979	2489	0.68799	0.86696	15.79	0.00077767	1.9913e-08
	0.7	0.00031138	0.26491	270.1	1.1598e-08	1.007	2433	0.68077	0.86484	17.19	0.00062336	2.1913e-09
	0.8	0.00039793	0.26491	271.4	1.2027e-08	1.003	3049	0.68032	0.86952	15.9	0.000507	4.0286e-08
	0.9	0.00041053	0.26491	273.3	1.2064e-08	1.003	3573	0.68539	0.86576	15.99	0.00040837	4.2822e-08
	1	0.0014821	1	315.4	3.6837e-08	0.90771	12309	0.27689	0.93093	64.52	0.00022378	0.7233
RRa-P3HT3	0	0.00041938	5	152.1	3.4284e-08	1	35644	0.039721	0.41115	723.6	1.0884e-07	0.84535
	0.1	0.0013732	5	165.9	4.5518e-08	1	27348	0.026144	0.36698	0.00018393	1.2354e-07	0.82393
	0.2	0.0011138	5	173.3	4.062e-08	1	15666	0.009746	0.3138	0.00013655	1.3469e-07	0.82378
	0.3	0.00015707	5	202.8	2.9141e-08	0.97602	19467	0.093346	0.31214	4.5952e-05	2.1483e-08	0.98401
	0.4	0.00033015	5	322.9	1.4581e-08	0.97505	5758	0.51204	0.83349	784.7	2.211e-05	0.76153
	0.5	0.00012953	5	310	1.1239e-08	0.99461	4221	0.56813	0.83325	44.56	0.00010257	0.719
	0.6	0.00060564	5	293.1	9.6204e-09	1.012	2503	0.65875	0.85909	12.11	0.00036188	2.5371e-08
	0.7	0.0015519	5	291.3	9.4419e-09	1.013	2383	0.63899	0.86334	10.93	0.00028462	7.9744e-08
	0.8	0.0012518	5	286.1	8.4736e-09	1.024	2840	0.61764	0.85719	14.68	5.0485e-05	5.3452e-08
	0.9	0.0070044	5	286.4	8.4802e-09	1.024	3068	0.59395	0.85163	14.89	4.3267e-06	5.9534e-07
	1	0.0022333	5	322.3	2.1606e-08	0.94342	30633	0.24207	0.97358	67.24	0.00014826	0.80994
Echem-P3HT1	0	0.00019503	1.096	216.8	2.0893e-08	0.97883	18416	0.0057845	0.35697	68870	1.8146e-06	0.72676
	0.1	0.00021869	6	226.9	2.4904e-08	0.96394	3675	0.0035788	0.28579	6987	2.783e-06	0.69833
	0.2	0.00023923	4.111	268.2	2.1339e-08	0.9613	1417	0.01132	0.37019	383.7	1.1246e-06	0.84628
	0.3	0.00036666	3.894	281.9	2.471e-08	0.94435	129.5	0.0014706	0.40095	41.83	2.3939e-07	1.081
	0.4	0.00019948	2.9885e-06	286.7	2.0758e-08	0.95616	888	0.010292	0.44046	3052	5.4718e-05	0.84589
	0.5	0.0002193	2.56	271.5	1.5155e-08	0.98113	373.8	0.0056507	0.40946	1770	7.5312e-05	0.85938
	0.6	0.0013099	5.198	233.3	1.7989e-08	0.97493	3.813	7.9711e-05	0.40681	30.8	9.6119e-08	1
	0.7	0.0014867	5.198	233.3	1.7989e-08	0.97493	2.556	4.676e-05	0.40739	30.8	9.6119e-08	1
	0.8	0.00033517	10.83	259.1	1.4529e-08	0.98758	52.2	0.00094788	0.55212	2.5783e-06	0.00011389	0.69309
	0.9	0.00030632	9.533	262.5	1.6425e-08	0.97814	43.68	0.00072777	0.50478	6.255	9.2826e-05	0.63552
	1	0.00077318	11.51	258.9	1.6611e-08	0.97791	0.86761	9.5371e-07	0.34651	129.2	1.3721e-06	0.95834
Echem-P3HT2	0	0.00025414	5	195.8	1.8406e-08	1	5619	0.0062745	0.34754	0.0010182	4.3231e-07	0.80446
	0.1	0.00098729	2	248.3	3.1214e-08	0.93595	95.99	1.9571e-06	0.24333	951.8	1.3441e-06	0.76258
	0.2	0.00044676	5.198	236.9	2.2625e-08	0.96342	18617	0.44915	0.71516	2450	9.0334e-06	0.64537
	0.3	0.00072877	2	248.3	3.1214e-08	0.93595	58.41	0.00072514	0.41297	441.8	6.8818e-06	0.71815
	0.4	0.0012751	2	248.3	3.1214e-08	0.93595	25.66	0.00036919	0.38352	101.4	5.1881e-06	0.75158
	0.5	0.0013023	2	248.3	3.1214e-08	0.93595	17.72	0.00035685	0.37901	35.79	1.6571e-06	0.84396
	0.6	0.0029437	2	248.3	3.1214e-08	0.93595	18.26	0.00045581	0.38919	35.79	1.6571e-06	0.84396
	0.7	0.003096	2	248.3	3.1214e-08	0.93595	7.896	0.00016326	0.46447	154.9	0.00013828	0.50183
	0.8	0.00064538	2	248.3	3.1214e-08	0.93595	5.857	3.3837e-05	0.35181	156.7	6.5498e-07	1.026
	0.9	0.00048354	2	248.3	3.1214e-08	0.93595	6.844	3.3298e-05	0.35038	408.2	1.5278e-06	0.93108
	1	0.00053135	2	248.3	3.1214e-08	0.93595	85.83	0.0010729	0.36157	826.4	1.685e-06	0.92305
Echem-P3HT3	0	0.012515	5.198	236.9	2.2625e-08	0.96342	451.2	0.00029818	0.3926	5.2058e-08	2.0375e-08	1
	0.1	0.0024835	3.5	161.1	1.0515e-08	1	1667	0.0011779	0.4689	8.99e-07	7.3157e-06	0.53388
	0.2	0.001607	2	268.9	7.8038e-08	0.86776	768.3	0.016492	0.5477	12377	6.4985e-06	0.75005
	0.3	0.00065563	1.1378e-06	244.4	4.047e-08	0.91491	277.8	0.0045675	0.44408	1059	4.9055e-06	0.80293
	0.4	0.00078257	5	213.8	2.0337e-08	0.97002	46.91	0.00095166	0.4119	183.5	3.2492e-06	0.82432
	0.5	0.00072794	5	213.8	2.0337e-08	0.97002	14.35	0.00033886	0.40005	64.68	7.9479e-07	0.95134
	0.6	0.0011265	5	213.8	2.0337e-08	0.97002	3.171	8.5963e-05	0.42053	44.95	5.2766e-07	1
	0.7	0.0005967	2	233	4.4155e-08	0.91149	4.738	0.00015841	0.48229	46.05	0.00012203	0.54353
	0.8	0.00183	2	262.1	8.6355e-08	0.85606	5.619	0.0001457	0.53425	62.87	0.00011668	0.67267
	0.9	0.00126	2	233	4.4155e-08	0.91149	0.95897	1.1133e-05	0.40925	119.6	1.0206e-06	0.99549
	1	0.00083774	2	233	4.4155e-08	0.91149	2.155	1.2711e-05	0.37921	631.2	1.5237e-06	0.95565
